# Supplementary material
Source: publisher figshare collection journal article supplement (https://acs.figshare.com/ndownloader/files/4970146)
Supplement: Supplementary file 1 [file 4970146]

## Supplementary Information

# Reaction Pathways in $\text{Ca}(\text{BH}_4)_2\text{-NaNH}_2$ and $\text{Mg}(\text{BH}_4)_2\text{-NaNH}_2$ Hydrogen-Rich Systems

*Fabrice Morelle<sup>†</sup>, Lars H. Jepsen<sup>‡</sup>, Torben R. Jensen<sup>‡</sup>, Manish Sharma<sup>§</sup>, Hans Hagemann<sup>§</sup>,  
Yaroslav Filinchuk<sup>†,\*</sup>*

<sup>†</sup> Institute of Condensed Matter and Nanosciences, Université catholique de Louvain, Place L.  
Pasteur 1, 1348 Louvain-la-Neuve, Belgium

<sup>‡</sup> Center for Materials Crystallography, Interdisciplinary Nanoscience Center (iNANO) and  
Department of Chemistry, Aarhus University, Langelandsgade 140, DK-8000 Aarhus C,  
Denmark

<sup>§</sup> Département de chimie physique, Sciences II, Université de Genève, 30, Quai Ernest-  
Ansermet, CH-1211 Genève 4, Switzerland

\* Yaroslav Filinchuk, E-mail: [yaroslav.filinchuk@uclouvain.be](mailto:yaroslav.filinchuk@uclouvain.be) Fax: +32-10-47-27-07.

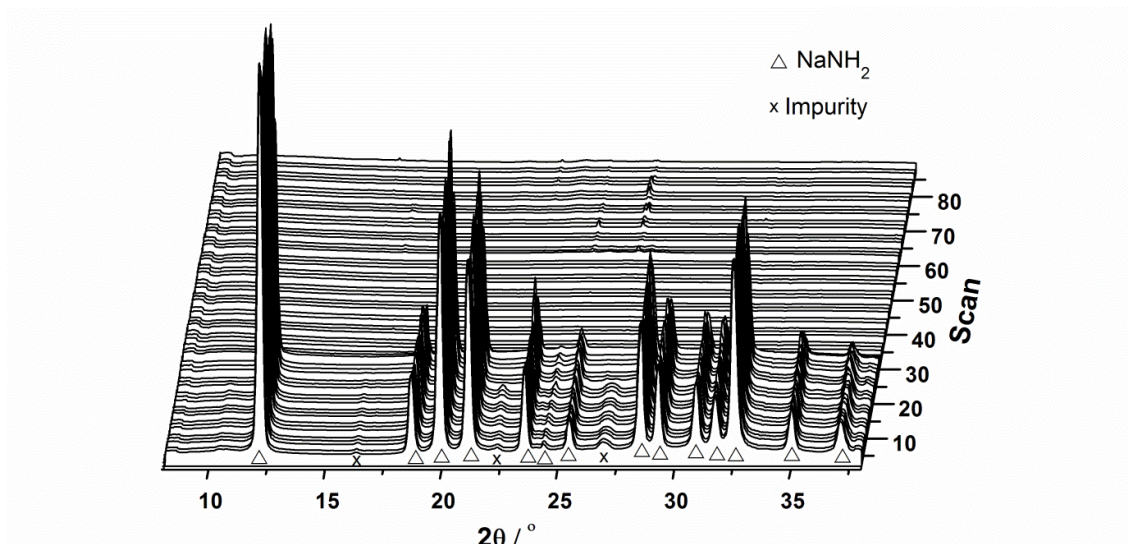

**Figure S1.** *In situ* SR-PXD on the pristine  $\text{NaNH}_2$ .  $\text{Na}_3\text{N}$  is not observed after the decomposition of  $\text{NaNH}_2$ , contrary the  $\text{Ca}(\text{BH}_4)_2\text{-NaNH}_2$  samples. The impurity marked with the x sign is NaOH.

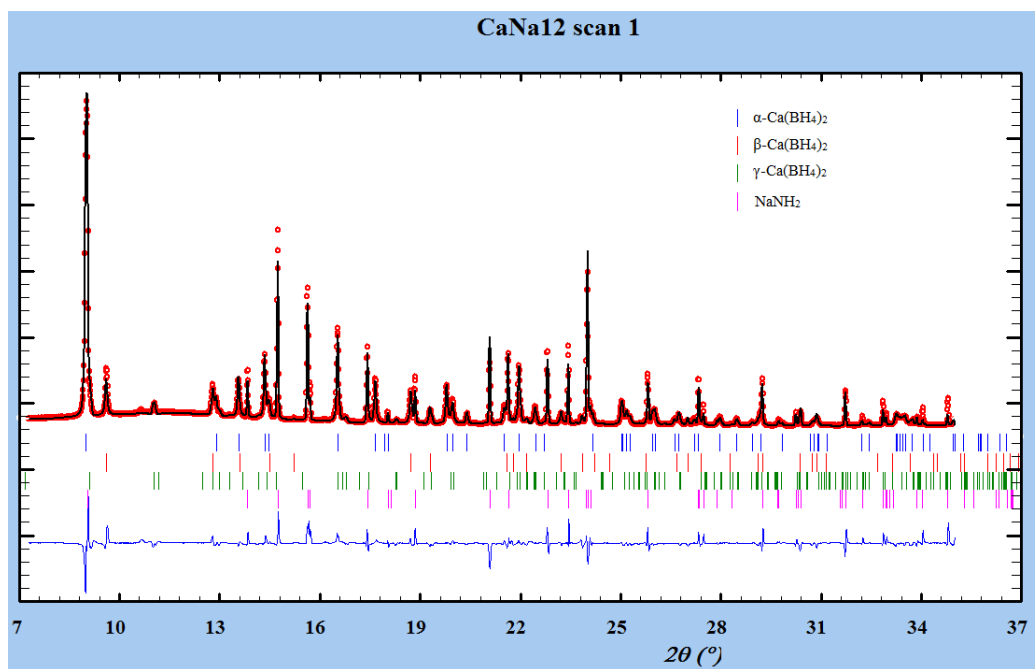

**Figure S2:** Rietveld fit of the first scan of the *in situ* SR-PXD of  $\text{CaNa12}$ .  $\text{NaNH}_2$  could not be fitted very well due to its spottiness. (red circles are the data, black line is the model, blue line shows the residues)

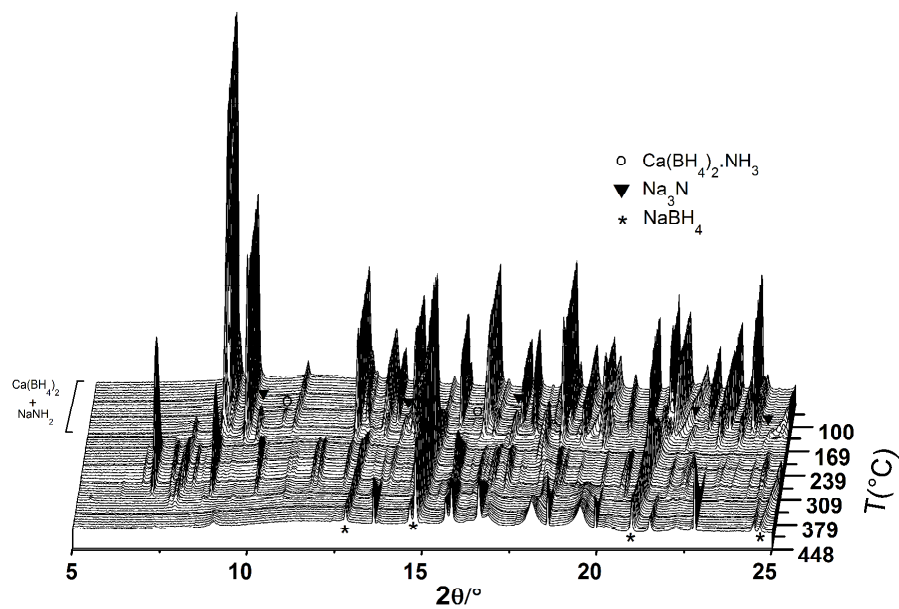

**Figure S3.** *In situ* SR-PXD on the CaNa11 sample.

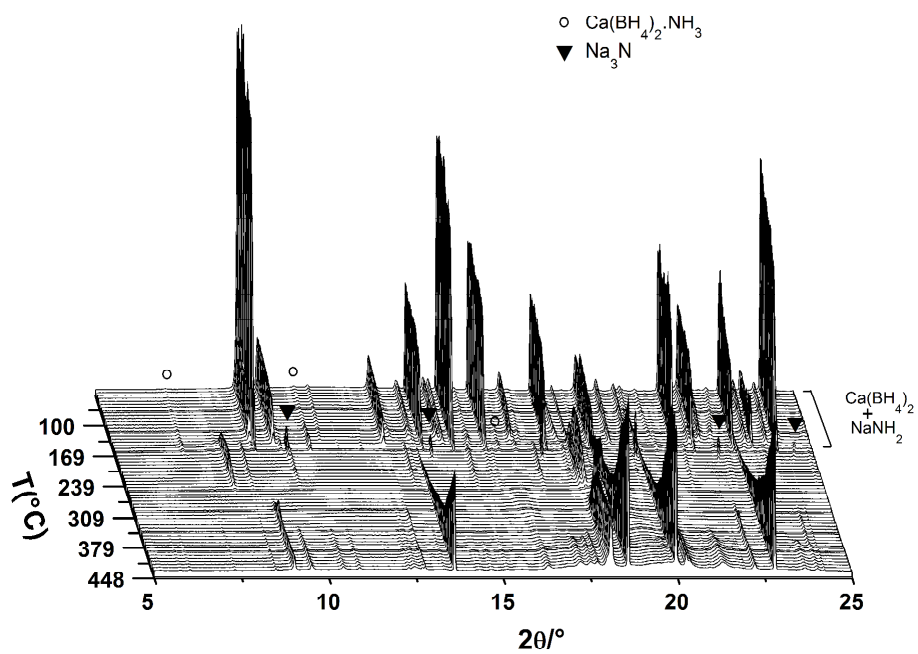

**Figure S4.** *In situ* SR-PXD on the CaNa13 sample.

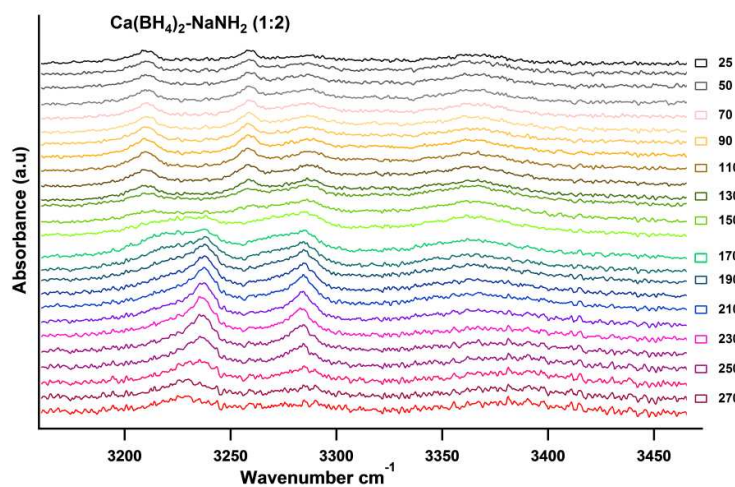

**Figure S5.** Expansion of the N-H stretching region of the *in situ* FT-IR data on CaNa12.

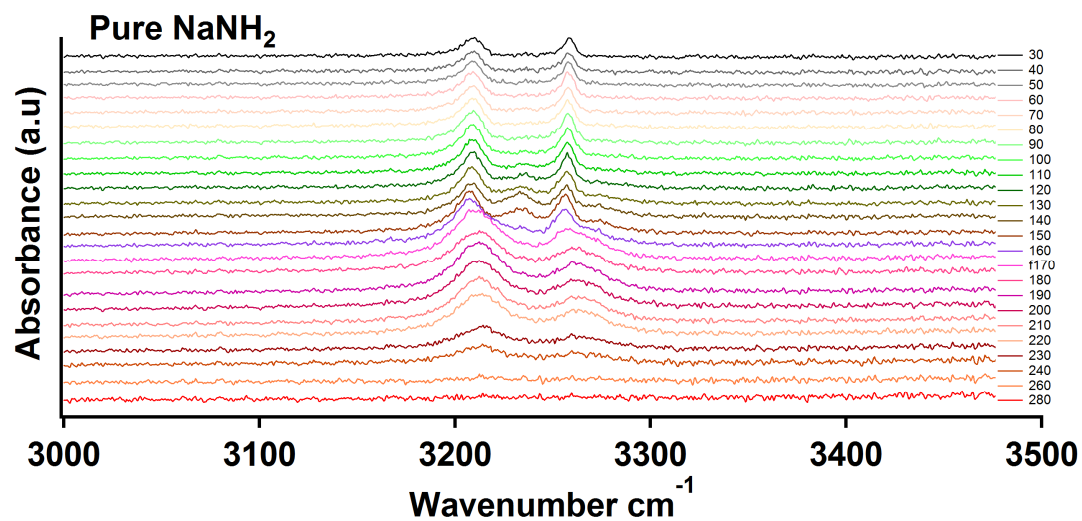

**Figure S6:** Temperature dependent FT-IR spectra of pure NaNH<sub>2</sub>, focus on the N-H stretching bands. To the contrary of what happens in the CaNa12 sample, the bands remain centered at the same frequency up to the decomposition of the compound.

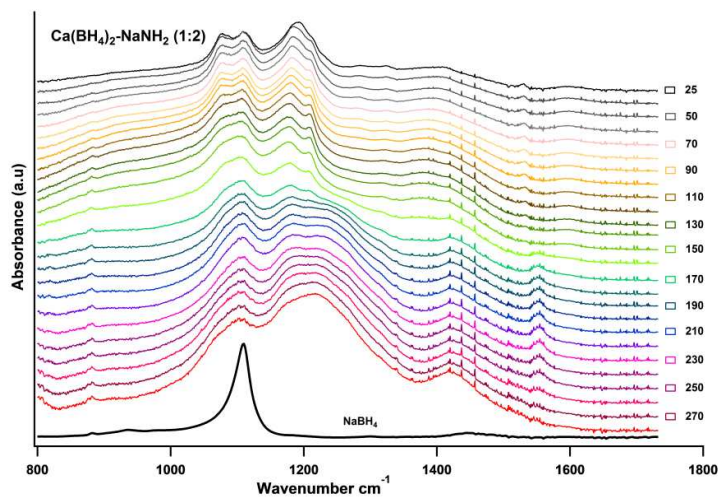

**Figure S7.** Expansion of the B-H bending region of the *in situ* FT-IR data on CaNa12.

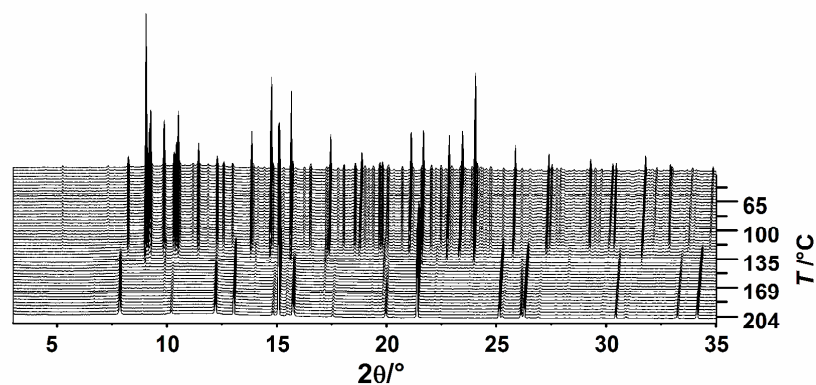

**Figure S8.** *In situ* SR-PXD on the MgNa12 sample. The starting materials disappear from the diffraction pattern around 135 °C, forming NaBH<sub>4</sub> and some other unknown material, similarly to the other samples.
